# Supplementary material for: Quantitative characterization of agglomerates and aggregates of pyrogenic and precipitated amorphous silica nanomaterials by transmission electron microscopy
Source: PubMed Central journal article supplement (PMC3462150; doi:10.1186/1477-3155-10-24), 2012-06-18
Supplement: 1477-3155-10-24-S1.pdf [file 1477-3155-10-24-S1.pdf]

| Measured parameter <sup>a</sup>               | Description                                                                                                                                                                                     |
|-----------------------------------------------|-------------------------------------------------------------------------------------------------------------------------------------------------------------------------------------------------|
| Area <sup>b,c</sup> (nm <sup>2</sup> )        | Projection area                                                                                                                                                                                 |
| Convex area <sup>b</sup> (nm <sup>2</sup> )   | The area of the convex hull (envelope) bounding the measured object.                                                                                                                            |
| Rectangle max (nm <sup>2</sup> )              | The area of the biggest rectangle whose sides consist of tangents to the measured object borders.                                                                                               |
| Rectangle mean (nm <sup>2</sup> )             | The area of the mean rectangle whose sides consist of tangents to the measured object borders.                                                                                                  |
| Rectangle min <sup>d</sup> (nm <sup>2</sup> ) | The area of the smallest rectangle whose sides consist of tangents to the measured object borders.                                                                                              |
| ECD <sup>e</sup> (nm)                         | The equivalence refers to the area of the measured object. The ECD is the diameter of a circle that has an area equal to the area of the measured object.                                       |
| Feret max <sup>c</sup> (nm)                   | The maximum distance of parallel tangents at opposing measured object borders.                                                                                                                  |
| Feret mean <sup>f</sup> (nm)                  | The mean distance of parallel tangents at opposing measured object borders.                                                                                                                     |
| Feret min <sup>c</sup> (nm)                   | The minimum distance of parallel tangents at opposing measured object borders.                                                                                                                  |
| Radius of inner circle (nm)                   | Radius of the maximal circle inside the measured object.                                                                                                                                        |
| Central distance max (nm)                     | The maximum distance between the center and the border of a measured object.                                                                                                                    |
| Central distance mean (nm)                    | The mean distance between the center and the border of a measured object.                                                                                                                       |
| Central distance min (nm)                     | The minimum distance between the center and the border of a measured object.                                                                                                                    |
| Diameter max (nm)                             | The maximum diameter of a measured object (for angles in the range 0° through 179° with step width 1°).                                                                                         |
| Diameter mean (nm)                            | The mean diameter of a measured object (for angles in the range 0° through 179° with step width 1°).                                                                                            |
| Diameter min (nm)                             | The minimum diameter of a measured object (for angles in the range 0° through 179° with step width 1°).                                                                                         |
| Convex perimeter <sup>b</sup> (nm)            | The length of the perimeter of the convex hull (envelope) bounding the particle.                                                                                                                |
| Perimeter <sup>b</sup> (nm)                   | The sum of the pixel distances along the closed boundary.                                                                                                                                       |
| Aspect Ratio <sup>g</sup>                     | The maximum ratio of width and height of a bounding rectangle for the measured object.                                                                                                          |
| Convexity <sup>h</sup>                        | The fraction of the measured object's area and the area of its convex hull.                                                                                                                     |
| Elongation                                    | The elongation of the measured object can be considered as lack of roundness. It results from the sphericity.                                                                                   |
| Shape factor <sup>i</sup>                     | The shape factor provides information about the "roundness" of the measured object. For a spherical measured object the shape factor is 1; for all other measured objects it is smaller than 1. |
| Sphericity                                    | Describes the sphericity or 'roundness' of the measured object by using central moments.                                                                                                        |

**a** These parameters are used in the iTEM software and are described in the iTEM help files

**b** As described in ISO 9276-6:2008

**c** As described in ISO 13322-1:2004

**d** Feret box area<sup>b</sup>

**e** Area equivalent diameter<sup>c</sup>

**f** Angle-average feret diameter

**g** Shape factor<sup>b,c</sup>

**h** Solidity<sup>b</sup>

**i** Form Factor<sup>b</sup>
