# Supplementary material for: Quantitative characterization of agglomerates and aggregates of pyrogenic and precipitated amorphous silica nanomaterials by transmission electron microscopy
Source: PubMed Central journal article supplement (PMC3462150; doi:10.1186/1477-3155-10-24), 2012-06-18
Supplement: 1477-3155-10-24-S2.pdf [file 1477-3155-10-24-S2.pdf]

---

| Product       | PC1          | PC2          | PC3         | Cumulative   |
|---------------|--------------|--------------|-------------|--------------|
| <b>NM-200</b> | 73,4 ± 0,7 % | 13,5 ± 0,1 % | 6,6 ± 0,5 % | 93,6 ± 0,3 % |
| <b>NM-201</b> | 73,7 ± 0,4 % | 13,7 ± 0,1 % | 6,8 ± 0,1 % | 94,2 ± 0,5 % |
| <b>NM-202</b> | 73,5 ± 0,3 % | 12,9 ± 0,2 % | 6,5 ± 0,2 % | 92,9 ± 0,2 % |
| <b>NM-203</b> | 74,1 ± 0,4 % | 12,9 ± 0,1 % | 6,4 ± 0,1 % | 93,0 ± 0,3 % |

---
